# Supplementary material for: Results of a Long-Term International Comparison of Greenhouse Gas and Isotope Measurements at the Global Atmosphere Watch (GAW) Observatory in Alert, Nunavut, Canada
Source: Copernicus journal article supplement (doi:10.5194/amt-2023-99), 2023-06-08
Supplement: Supplementary file 1 [file amt-2023-99-supplement.zip]

**File: ICP Supplementary Figures and Tables.doc**

**Table S1.** WMO/ IAEA Round Robin experiments results (laboratory minus NOAA or INSTAAR) conducted over the time period, that are on the same scale as the data used in the analysis. All RR data is from the WMORR website ([Global Monitoring Laboratory - Carbon Cycle Greenhouse Gases \(noaa.gov\)](https://globalmonitoringlaboratory-carboncyclegreenhousegases.noaa.gov/)) except for ECCC's SF<sub>6</sub> data, which was updated to the SF<sub>6</sub> X2014 scale, and CSIRO's  $\delta^{13}\text{C}$  and  $\delta^{18}\text{O}$  RR#5 data, which was provided to us by CSIRO. INSTARR's  $\delta^{13}\text{C}$  and  $\delta^{18}\text{O}$  data was provided to us by INSTAAR, with updates for scale via JRAS-06 realization, to be consistent with flask data scale realization. All other laboratory isotope differences were updated according to the new INSTAAR data.

| Species                   | RR # | Date      | CSIRO                  | MPI-BGC                | UHEI-IUP               | LSCE             | SIO                 | ECCC                 |
|---------------------------|------|-----------|------------------------|------------------------|------------------------|------------------|---------------------|----------------------|
| CO <sub>2</sub> (ppm)     | 5    | 2009-2012 | 0.00, 0.00, -0.10      | -0.02, 0.00, 0.00      | -0.04, -0.04, -0.08    | 0.06, 0.01, 0.12 | -0.20, -0.14, -0.11 | -0.02, -0.02, -0.03  |
|                           | 6    | 2014-2015 | 0.04, 0.00             | -0.01, -0.02           | -0.03, -0.06           | -0.05, 0.00      |                     | 0.09, 0.06           |
| $\delta^{13}\text{C}$ (‰) | 5    | 2009-2012 | -0.055, -0.061, -0.082 | -0.056, -0.044, -0.048 | -0.053, -0.050, -0.056 |                  |                     | 0.006, 0.001, -0.006 |
|                           | 6    | 2014-2015 | -0.042, -0.029         | -0.033, -0.039         | -0.082, -0.086         |                  |                     | 0.013, 0.003         |
| $\delta^{18}\text{O}$ (‰) | 5    | 2009-2012 | 0.111, 0.022, -0.024   | -0.452, -0.066, -0.656 | 0.081, 0.112, 0.035    |                  |                     | 0.187, 0.170, 0.107  |
|                           | 6    | 2014-2015 | 0.177, 0.210           | 0.066, 0.066           | 0.035, -0.016          |                  |                     | 0.200, 0.165         |
| CH <sub>4</sub> (ppb)     | 6    | 2014-2015 | 0.50, 0.60             | 0.30, -0.40            | 0.10, -0.70            |                  |                     | 0.30, 0.40           |
| N <sub>2</sub> O (ppb)    | 5    | 2009-2012 | -0.11, -0.05, -0.15    |                        |                        |                  |                     |                      |
|                           | 6    | 2014-2015 | -0.10, -0.14           | 0.16, -0.07            | 0.14, 0.01             | 0.24, 0.37       |                     | -0.45, -0.43         |
| SF <sub>6</sub> (ppt)     | 6    | 2014-2015 |                        | 0.00, 0.02             |                        |                  |                     | 0.05, 0.05           |

**Table S2.** Time stamps of data sets (mm/dd/yyyy)

**ALERT**

| Laboratory | CO <sub>2</sub> | CH <sub>4</sub> | N <sub>2</sub> O | SF <sub>6</sub> | $\delta^{13}\text{C-CO}_2$ | $\delta^{18}\text{O-CO}_2$ |
|------------|-----------------|-----------------|------------------|-----------------|----------------------------|----------------------------|
| CSIRO      | 10/09/2018      | 10/09/2018      | 10/09/2018       |                 | 10/09/2018                 | 10/09/2018                 |
| MPI-BGC    | 02/02/2018      | 02/02/2018      | 02/02/2018       | 02/02/2018      | 02/02/2018                 | 02/02/2018                 |
| UHEI-IUP   | 03/06/2018      | 03/06/2018      | 03/06/2018       |                 | 03/06/2018                 | 03/06/2018                 |
| LSCE       | 03/23/2017      | 03/20/2017      | 03/23/2017       | 03/23/2017      | 09/25/2017                 | 10/03/2017                 |
| SIO        | 01/17/2019      |                 |                  |                 | 01/17/2019                 | 01/17/2019                 |
| ECCC       | 11/06/2018      | 01/24/2018      | 03/02/2018       | 01/24/2018      | 09/04/2018                 | 08/20/2018                 |
| NOAA       | 10/10/2018      | 11/14/2018      | 11/14/2018       | 02/02/2018      | 01/23/2020                 | 01/23/2020                 |

**CGO**

| Laboratory | CO <sub>2</sub> | CH <sub>4</sub> | N <sub>2</sub> O | $\delta^{13}\text{C-CO}_2$ | $\delta^{18}\text{O-CO}_2$ |
|------------|-----------------|-----------------|------------------|----------------------------|----------------------------|
| CSIRO      | 10/18/2018      | 07/05/2018      | 07/05/2018       | 10/18/2018                 | 10/09/2018                 |
| NOAA       | 10/18/2018      | 07/03/2018      | 06/28/2018       | 01/23/2020                 | 01/23/2020                 |

**MLO**

| Laboratory | CO <sub>2</sub> | CH <sub>4</sub> | N <sub>2</sub> O | $\delta^{13}\text{C-CO}_2$ | $\delta^{18}\text{O-CO}_2$ |
|------------|-----------------|-----------------|------------------|----------------------------|----------------------------|
| CSIRO      | 10/18/2018      | 07/05/2018      | 07/05/2018       | 10/18/2018                 | 10/10/2018                 |
| SIO        | 01/17/2019      |                 |                  | 01/17/2019                 | 01/17/2019                 |
| NOAA       | 10/18/2018      | 06/28/2018      | 06/28/2018       | 01/23/2020                 | 01/23/2020                 |

**Table S3.** Compilation of average flask pair differences for CO<sub>2</sub>, in ppm, for each laboratory

|          | AVERAGE FLASK<br>PAIR DIFFERENCE | STD DEV. OF PAIR<br>DIFF | NUMBER OF<br>DATA PTS |
|----------|----------------------------------|--------------------------|-----------------------|
| CSIRO    | 0.15                             | 0.21                     | 346                   |
| MPI-BGC  | 0.12                             | 0.25                     | 302                   |
| UHEI-IUP | 0.12                             | 0.07                     | 546                   |
| LSCE     | 0.11                             | 0.11                     | 239                   |
| SIO      | 0.10                             | 0.08                     | 640                   |
| ECCC     | 0.10                             | 0.12                     | 825                   |
| NOAA     | 0.10                             | 0.17                     | 879                   |

**Table S4.** Compilation of average flask pair differences for  $\delta^{13}\text{C}\text{-CO}_2$  (‰) for each laboratory

|                 | AVERAGE FLASK<br>PAIR DIFFERENCE | STD DEV. OF PAIR<br>DIFF | NUMBER OF<br>DATA PTS |
|-----------------|----------------------------------|--------------------------|-----------------------|
| <b>CSIRO</b>    | 0.015                            | 0.015                    | 309                   |
| <b>MPI-BGC</b>  | 0.039                            | 0.093                    | 286                   |
| <b>UHEI-IUP</b> | 0.013                            | 0.009                    | 409                   |
| <b>LSCE</b>     | 0.057                            | 0.102                    | 189                   |
| <b>SIO</b>      | 0.028                            | 0.018                    | 11                    |
| <b>ECCC</b>     | 0.013                            | 0.018                    | 439                   |
| <b>NOAA</b>     | 0.018                            | 0.021                    | 795                   |

**Table S5.** Compilation of average flask pair differences for  $\delta^{18}\text{O}\text{-CO}_2$  (‰) for each laboratory

|                 | AVERAGE FLASK<br>PAIR DIFFERENCE | STD DEV. OF PAIR<br>DIFF | NUMBER OF<br>DATA PTS |
|-----------------|----------------------------------|--------------------------|-----------------------|
| <b>CSIRO</b>    | 0.119                            | 0.132                    | 307                   |
| <b>MPI-BGC</b>  | 0.104                            | 0.179                    | 286                   |
| <b>UHEI-IUP</b> | 0.029                            | 0.018                    | 280                   |
| <b>LSCE</b>     | 0.215                            | 0.396                    | 189                   |
| <b>SIO</b>      | 0.080                            | 0.089                    | 11                    |
| <b>ECCC</b>     | 0.060                            | 0.050                    | 391                   |
| <b>NOAA</b>     | 0.064                            | 0.103                    | 635                   |

**Table S6.** Compilation of average flask pair differences for CH<sub>4</sub>, in ppb, for each laboratory

|          | AVERAGE FLASK<br>PAIR DIFFERENCE | STD DEV. OF PAIR<br>DIFF | NUMBER OF<br>DATA PTS |
|----------|----------------------------------|--------------------------|-----------------------|
| CSIRO    | 1.86                             | 1.74                     | 346                   |
| MPI-BGC  | 1.42                             | 1.44                     | 303                   |
| UHEI-IUP | 1.61                             | 2.34                     | 504                   |
| LSCE     | 1.23                             | 1.22                     | 247                   |
| ECCC     | 0.74                             | 0.76                     | 841                   |
| NOAA     | 1.24                             | 1.23                     | 886                   |

**Table S7.** Compilation of average flask pair differences for N<sub>2</sub>O, in ppb, for each laboratory

|                 | <b>AVERAGE FLASK<br/>PAIR DIFFERENCE</b> | <b>STD DEV. OF PAIR<br/>DIFF</b> | <b>NUMBER OF<br/>DATA PTS</b> |
|-----------------|------------------------------------------|----------------------------------|-------------------------------|
| <b>CSIRO</b>    | 0.29                                     | 0.22                             | 338                           |
| <b>MPI-BCG</b>  | 0.16                                     | 0.13                             | 302                           |
| <b>UHEI-IUP</b> | 0.13                                     | 0.08                             | 532                           |
| <b>LSCE</b>     | 0.16                                     | 0.13                             | 245                           |
| <b>ECCC</b>     | 0.19                                     | 0.14                             | 690                           |
| <b>NOAA</b>     | 0.30                                     | 0.26                             | 861                           |

**Table S8.** Compilation of average flask pair differences for SF<sub>6</sub>, in ppt, for each laboratory

|                | AVERAGE FLASK<br>PAIR DIFFERENCE | STD DEV. OF PAIR<br>DIFF | NUMBER OF<br>DATA PTS |
|----------------|----------------------------------|--------------------------|-----------------------|
| <b>MPI-BGC</b> | 0.03                             | 0.04                     | 299                   |
| <b>LSCE</b>    | 0.04                             | 0.04                     | 257                   |
| <b>ECCC</b>    | 0.03                             | 0.03                     | 691                   |
| <b>NOAA</b>    | 0.04                             | 0.04                     | 864                   |



**Table S9.** Summary of same-flask annual median CO<sub>2</sub> values, in ppm, for each of the five laboratory difference distributions (laboratory minus ECCC). The 95 % confidence limits of the computed annual median value are shown in parentheses followed by the number of individual measurement differences included in the computation.

| Year      | CSIRO                 | MPI-BGC                | UHEI-IUP               | LSCE                 | NOAA                     |
|-----------|-----------------------|------------------------|------------------------|----------------------|--------------------------|
| 1999      |                       |                        |                        |                      | -0.17 (-0.20,-0.12) 13   |
| 2000      |                       |                        |                        |                      | -0.02 (-0.03,0.01) 60    |
| 2001      |                       |                        |                        |                      | 0.02 (-0.01,0.04) 46     |
| 2002      | 0.25 (0.18,0.33) 32   |                        |                        |                      | 0.02 (0.00,0.03) 89      |
| 2003      | 0.21 (0.15,0.26) 40   |                        |                        |                      | 0.00 (-0.01,0.03) 88     |
| 2004      | 0.20 (0.16,0.27) 34   |                        |                        |                      | -0.02 (-0.03,0.00) 73    |
| 2005      | 0.10 (0.05,0.15) 37   | 0.00 (-0.05,0.05) 34   | 0.13 (0.10,0.15) 46    |                      | -0.03 (-0.05,0.00) 76    |
| 2006      | 0.10 (0.06,0.14) 32   | 0.01 (-0.05,0.14) 18   | 0.16 (0.10,0.22) 33    |                      | 0.03 (0.01,0.05) 95      |
| 2007      | 0.10 (0.04,0.20) 23   | 0.06 (0.01,0.10) 20    | 0.10 (0.05,0.17) 31    | 0.49 (0.44,0.56) 23  | 0.04 (0.02,0.05) 92      |
| 2008      | 0.05 (0.02,0.09) 35   | -0.10 (-0.21,0.04) 18  | -0.13 (-0.15,0.00) 14  | 0.16 (0.12,0.24) 32  | -0.16 (-0.20,-0.09) 69   |
| 2009      | 0.10 (0.08,0.14) 57   | -0.08 (-0.16,0.16) 17  | 0.00 (-0.04,0.08) 30   | 0.17 (0.15,0.23) 37  | -0.04 (-0.07,-0.01) 88   |
| 2010      | 0.02 (0.00,0.06) 74   | -0.03 (-0.10,0.03) 21  | -0.05 (-0.05,-0.01) 40 | 0.07 (0.04,0.10) 37  | -0.08 (-0.09,-0.06) 92   |
| 2011      | -0.01 (-0.06,0.03) 62 | 0.00 (-0.04,0.05) 19   | -0.04 (-0.06,0.00) 33  | 0.06 (-0.02,0.14) 37 | -0.04 (-0.06,0.00) 46    |
| 2012      | -0.01 (-0.03,0.03) 67 | -0.04 (-0.10,0.00) 22  | -0.03 (-0.06,0.01) 41  | 0.11 (0.08,0.13) 43  | -0.06 (-0.08,-0.04) 49   |
| 2013      | 0.01 (-0.02,0.04) 66  | -0.09 (-0.12,0.29) 17  | -0.07 (-0.09,-0.04) 32 | 0.07 (0.02,0.20) 13  | -0.09 (-0.10,-0.06) 48   |
| 1999-2013 | 0.06 (0.05,0.07) 559  | -0.02 (-0.04,0.00) 186 | 0.00 (-0.01,0.02) 300  | 0.12 (0.11,0.15) 222 | -0.02 (-0.03,-0.01) 1024 |

**Table S10.** 11-12 year increases of CO<sub>2</sub> (ppm) calculated from individual datasets from six laboratories (2005-2016), using the de-seasoned data from Nakazawa's curve-fitting routine. (Nakazawa et al., 1997)

| 12 yr trend | 2016   | 2005   | 2005-2016 | 11 yr trend | 2015   | 2005   | 2005-2015 | 11 yr trend | 2016   | 2006   | 2006-2016 |
|-------------|--------|--------|-----------|-------------|--------|--------|-----------|-------------|--------|--------|-----------|
| CSIRO       | 404.22 | 380.64 | 23.59     |             | 401.63 | 380.64 | 20.99     |             | 404.22 | 383.52 | 20.70     |
| MPI-BGC     | 404.25 | 380.82 | 23.43     |             | 401.88 | 380.82 | 21.06     |             | 404.25 | 383.45 | 20.81     |
| UHEI-IUP    | 404.15 | 380.68 | 23.47     |             | 401.69 | 380.68 | 21.01     |             | 404.15 | 383.32 | 20.83     |
| SIO         | 404.44 | 380.46 | 23.98     |             | 401.95 | 380.46 | 21.50     |             | 404.44 | 383.52 | 20.92     |
| ECCC        | 404.17 | 380.57 | 23.60     |             | 401.61 | 380.57 | 21.04     |             | 404.17 | 383.17 | 21.01     |
| NOAA        | 404.32 | 380.68 | 23.64     |             | 401.72 | 380.68 | 21.04     |             | 404.32 | 383.38 | 20.94     |
|             |        |        |           |             |        |        |           |             |        |        |           |
| Mean        | 404.26 | 380.64 | 23.62     | Mean        | 401.75 | 380.64 | 21.11     | Mean        | 404.26 | 383.39 | 20.87     |
| s.d.        | 0.11   | 0.12   | 0.20      | s.d.        | 0.14   | 0.12   | 0.19      | s.d.        | 0.11   | 0.13   | 0.11      |
| (Max - min) | 0.29   | 0.36   | 0.55      | (Max - min) | 0.35   | 0.36   | 0.50      | (Max - min) | 0.29   | 0.35   | 0.30      |
| Rel. Diff % |        |        | 2.33      | Rel. Diff % |        |        | 2.39      | Rel. Diff % |        |        | 1.45      |

Ref. Nakazawa, T., Ishizawa, M., Higuchi, K. and Trivett, N.B.: Two curve fitting methods applied to CO<sub>2</sub> flask data, Environmetrics, Vol 8, 197-218, 1997.

**Table S11.** Summary of same-flask annual median N<sub>2</sub>O values, in ppb, for each of the five laboratory difference distributions (laboratory minus ECCC). The 95 % confidence limits of the computed annual median value are shown in parentheses followed by the number of individual measurement differences included in the computation.

| Year      | CSIRO                   | MPI-BGC               | UHEI-IUP              | LSCE                 | NOAA                    |
|-----------|-------------------------|-----------------------|-----------------------|----------------------|-------------------------|
| 2001      |                         |                       |                       |                      | 0.08 (-0.04,0.20) 73    |
| 2002      | -0.27 (-0.36,-0.15) 30  |                       |                       |                      | -0.06 (-0.14,0.07) 97   |
| 2003      | -0.22 (-0.34,0.02) 39   |                       |                       |                      | -0.10 (-0.21,-0.03) 89  |
| 2004      | -0.23 (-0.28,-0.04) 31  |                       |                       |                      | -0.10 (-0.17,0.00) 77   |
| 2005      | -0.14 (-0.28,-0.01) 36  | -0.08 (-0.19,0.08) 32 | -0.01 (-0.04,0.18) 46 |                      | -0.40 (-0.52,-0.17) 73  |
| 2006      | -0.08 (-0.37,0.13) 33   | -0.01 (-0.30,0.42) 17 | -0.03 (-0.20,0.12) 34 |                      | -0.29 (-0.43,-0.12) 99  |
| 2007      | -0.27 (-0.60,0.04) 23   | 0.17 (-0.17,0.45) 21  | -0.05 (-0.31,0.14) 32 | 1.04 (0.84,1.26) 26  | -0.24 (-0.53,-0.09) 94  |
| 2008      | 0.13 (-0.13,0.40) 36    | 0.02 (-0.06,0.16) 19  | 0.16 (-0.06,1.85) 14  | 0.98 (0.90,1.29) 30  | 0.05 (-0.09,0.23) 68    |
| 2009      | 0.08 (-0.07,0.25) 55    | 0.12 (-0.42,0.91) 16  | 0.33 (0.26,0.49) 29   | 0.37 (0.27,0.62) 38  | -0.08 (-0.18,0.05) 85   |
| 2010      | -0.04 (-0.22,0.04) 73   | -0.16 (-0.26,0.29) 21 | 0.01 (-0.11,0.18) 38  | 0.45 (0.37,0.51) 37  | -0.17 (-0.30,-0.08) 89  |
| 2011      | -0.02 (-0.18,0.14) 62   | 0.28 (0.04,0.63) 18   | 0.23 (0.18,0.38) 32   | 0.44 (0.13,0.69) 35  | 0.16 (0.00,0.52) 47     |
| 2012      | 0.10 (-0.02,0.30) 37    | -0.04 (-0.21,0.65) 15 | 0.20 (0.02,0.49) 21   | 0.46 (0.30,0.89) 27  | 0.08 (-0.20,0.41) 31    |
| 2013      | -0.27 (-0.42,-0.08) 33  |                       | 0.04 (-0.10,0.45) 14  |                      | -0.06 (-0.20,0.11) 21   |
| 2001-2013 | -0.11 (-0.17,-0.05) 488 | 0.03 (-0.06,0.09) 163 | 0.09 (0.03,0.14) 260  | 0.55 (0.48,0.66) 201 | -0.10 (-0.14,-0.08) 943 |
