# Supplementary material for: Results of a Long-Term International Comparison of Greenhouse Gas and Isotope Measurements at the Global Atmosphere Watch (GAW) Observatory in Alert, Nunavut, Canada
Source: Copernicus journal article supplement (doi:10.5194/amt-2023-99), 2023-06-08
Supplement: Supplementary file 2 [file amt-2023-99-supplement.zip]

Archive with 4 entries (4 files):
- colocated_matched_data.zip
- ICP Suppl figs_tables_20230531.pdf
- ICP Supplementary figures_tables.pdf
- raw_data_combined.zip
